# Supplementary material
Source: Research Square preprint supplement (doi:10.21203/rs.3.rs-8767944/v1)
Supplement: Supplementary file 1 [file 7686f56b7e0b122ca1efe184.docx]

**APPENDIX A – COMPLETE FELINE PANLEUKOPENIA VIRUS SEQUENCES RETRIEVED FROM GENBANK (n = 446)**

| **GenBank Access** | **Country** | **Animal** | **Year** |
| --- | --- | --- | --- |
| MT270576.1 | China | Cat | 2019 |
| MT270580.1 | China | Cat | 2019 |
| MT270575.1 | China | Cat | 2019 |
| MT270579.1 | China | Cat | 2019 |
| MT270572.1 | China | Cat | 2019 |
| MT270573.1 | China | Cat | 2019 |
| MT270565.1 | China | Cat | 2019 |
| MT270574.1 | China | Cat | 2019 |
| MT270569.1 | China | Cat | 2019 |
| OK384310.1 | China | Cat | 2019 |
| OK384312.1 | China | Cat | 2019 |
| OK384313.1 | China | Cat | 2019 |
| OK384314.1 | China | Cat | 2019 |
| OK384311.1 | China | Cat | 2019 |
| MT270571.1 | China | Cat | 2019 |
| MT270562.1 | China | Cat | 2019 |
| MT270558.1 | China | Cat | 2019 |
| MT270568.1 | China | Cat | 2019 |
| MT270561.1 | China | Cat | 2019 |
| MT270554.1 | China | Cat | 2019 |
| MT270560.1 | China | Cat | 2019 |
| MT270557.1 | China | Cat | 2019 |
| MT270555.1 | China | Cat | 2019 |
| MT270556.1 | China | Cat | 2019 |
| MT270552.1 | China | Cat | 2019 |
| MT270553.1 | China | Cat | 2019 |
| MT270547.1 | China | Cat | 2019 |
| MT270551.1 | China | Cat | 2019 |
| MT270550.1 | China | Cat | 2019 |
| MT270548.1 | China | Cat | 2019 |
| MT270540.1 | China | Cat | 2019 |
| MT270541.1 | China | Cat | 2019 |
| MT270539.1 | China | Cat | 2019 |
| MT270536.1 | China | Cat | 2019 |
| MT270542.1 | China | Cat | 2019 |
| MT270531.1 | China | Cat | 2019 |
| MT270544.1 | China | Cat | 2019 |
| MT270535.1 | China | Cat | 2019 |
| EU145593.1 | Hungary | Asian Palm Civet | 2008 |
| MT270534.1 | China | Cat | 2019 |
| MT270532.1 | China | Cat | 2019 |
| MT270533.1 | China | Cat | 2019 |
| MZ836364.1 | China | Cat | 2020 |
| MZ836373.1 | China | Cat | 2020 |
| MN418999.1 | China | Cat | 2019 |
| MN419012.1 | China | Cat | 2019 |
| MZ836358.1 | China | Cat | 2020 |
| MZ836363.1 | China | Cat | 2020 |
| MZ836361.1 | China | Cat | 2020 |
| MZ836368.1 | China | Cat | 2020 |
| MZ836354.1 | China | Cat | 2020 |
| MZ836355.1 | China | Cat | 2020 |
| MZ836356.1 | China | Cat | 2020 |
| MW650831.1 | China | Cat | 2020 |
| MZ836352.1 | China | Cat | 2020 |
| MZ836353.1 | China | Cat | 2020 |
| MZ836347.1 | China | Cat | 2019 |
| MW017631.1 | China | Cat | 2020 |
| MW791427.1 | China | Cat | 2020 |
| MW811187.1 | China | Cat | 2020 |
| MW017626.1 | China | Cat | 2020 |
| MW791426.1 | China | Cat | 2020 |
| MT892650.1 | China | Cat | 2019 |
| MW017629.1 | China | Cat | 2020 |
| MW017630.1 | China | Cat | 2020 |
| MW659466.1 | China | Cat | 2020 |
| MT614366.1 | China | Cat | 2019 |
| MK266797.1 | China | Cat | 2017 |
| MW017618.1 | China | Dog | 2020 |
| OQ863615.1 | China | Cat | 2019 |
| MW017616.1 | China | Dog | 2020 |
| MW017596.1 | China | Dog | 2019 |
| MN908257.1 | China | South China Tiger | 2019 |
| MT270581.1 | China | Cat | 2019 |
| OP471917.1 | China | Cat | 2019 |
| OP471918.1 | China | Cat | 2019 |
| OQ863617.1 | China | Cat | 2019 |
| OQ863618.1 | China | Cat | 2019 |
| OP796707.1 | China | Cat | 2021 |
| OP796708.1 | China | Cat | 2021 |
| OP796709.1 | China | Cat | 2021 |
| OP796712.1 | China | Cat | 2021 |
| OP796710.1 | China | Cat | 2021 |
| OP796711.1 | China | Cat | 2021 |
| OP796715.1 | China | Cat | 2021 |
| OP796706.1 | China | Cat | 2021 |
| MN451652.1 | Finland | Arctic Fox | 1983 |
| MW847167.1 | Italy | Cat | 2016 |
| KX434462.1 | Italy | Cat | 2015 |
| EU498716.1 | UK | Cat | 2007 |
| MK671154.1 | China | Cat | 2016 |
| MK671159.1 | China | Cat | 2017 |
| MK266798.1 | China | Cat | 2018 |
| MK671178.1 | China | Cat | 2018 |
| EU498701.1 | Italy | Cat | 2006 |
| EU498707.1 | Italy | Cat | 2006 |
| EU498718.1 | Italy | Cat | 2007 |
| EU498720.1 | Italy | Cat | 2007 |
| JX475256.1 | USA | Cougar | 2011 |
| MZ508526.1 | Italy | Cat | 2019 |
| KT240134.1 | Portugal | Cat | 2013 |
| KT240136.1 | Portugal | Cat | 2014 |
| JN867596.1 | USA | Racoon | 1978 |
| JN867595.1 | USA | Racoon | 1978 |
| KM624023.1 | USA | Racoon | 1978 |
| EU659111.1 | USA | Cat | 1967 |
| MF069447.1 | Canada | Racoon | 2016 |
| JN867594.1 | USA | Racoon | 1990 |
| KJ813893.1: | USA | Bobcat | 2013 |
| EU659113.1 | USA | Mountain Lion | 1989 |
| EU659114.1 | USA | Mountain Lion | 1989 |
| MF069445.1 | Canada | Racoon | 2015 |
| MN862743.1 | Canada | Vison | 2018 |
| JX475254.1 | USA | Cougar | 2010 |
| JX475245.1 | USA | Cougar | 2010 |
| JX475259.1 | USA | Cougar | 2010 |
| MN862748.1 | Canada | North American River Otter | 2019 |
| MN862746.1 | Canada | Vison | 2017 |
| MN862747.1 | Canada | Vison | 2019 |
| MN862744.1 | Canada | American Marten | 2016 |
| MN862749.1 | Canada | North American River Otter | 2019 |
| EU498706.1 | Italy | Cat | 2006 |
| MT270537.1 | China | Cat | 2019 |
| MT270538.1 | China | Cat | 2019 |
| MK671184.1 | China | Cat | 2018 |
| MK671179.1 | China | Cat | 2018 |
| MK671169.1 | China | Cat | 2017 |
| MK671185.1 | China | Cat | 2018 |
| HQ184195.1 | South Korea | Cat | 2008 |
| MW847204.1 | Italy | Cat | 2019 |
| MW847205.1 | Italy | Cat | 2019 |
| EU498699.1 | Italy | Cat | 2006 |
| MZ357120.1 | China | Giant Panda | 2020 |
| MZ357120.1 | China | Cat | 2020 |
| MZ836350.1 | China | Cat | 2020 |
| MT270559.1 | China | Cat | 2019 |
| FJ440714.1 | Argentina | Cat | 2007 |
| FJ440712.1 | Argentina | Cat | 2007 |
| FJ440711.1 | Argentina | Cat | 2007 |
| FJ440713.1 | Argentina | Cat | 2007 |
| MW847208.1 | Italy | Cat | 2018 |
| MZ508525.1 | Italy | Cat | 2018 |
| MW847162.1 | Italy | Cat | 2013 |
| MW847168.1 | Italy | Cat | 2016 |
| MW847171.1 | Italy | Cat | 2016 |
| MW847166.1 | Italy | Cat | 2016 |
| MW847170.1 | Italy | Cat | 2016 |
| MW847198.1 | Italy | Cat | 2018 |
| MW847184.1 | Italy | Cat | 2017 |
| MW847163.1 | Italy | Cat | 2013 |
| MW847161.1 | Italy | Cat | 2012 |
| MW847195.1 | Italy | Cat | 2017 |
| MW847203.1 | Italy | Cat | 2019 |
| MW847160.1 | Italy | Cat | 2012 |
| MW847156.1 | Italy | Cat | 2011 |
| EU498708.1 | Italy | Cat | 2006 |
| MZ508523.1 | Italy | Cat | 2018 |
| EU498694.1 | Italy | Cat | 2005 |
| MW847172.1 | Italy | Cat | 2016 |
| EU498684.1 | Italy | Cat | 2002 |
| EU498712.1 | Italy | Cat | 2006 |
| EU498711.1 | Italy | Cat | 2006 |
| EU498695.1 | Italy | Cat | 2005 |
| EU498685.1 | Italy | Cat | 2003 |
| KP769859.1 | Belgium | Cat | 2013 |
| MW847182.1 | Italy | Cat | 2017 |
| MW847186.1 | Italy | Cat | 2017 |
| MW847157.1 | Italy | Cat | 2011 |
| EU498702.1 | Italy | Cat | 2006 |
| EU498696.1 | Italy | Cat | 2006 |
| EU498688.1 | Italy | Cat | 2004 |
| MW847164.1 | Italy | Cat | 2016 |
| EU498715.1 | Italy | Cat | 2006 |
| EU498691.1 | Italy | Cat | 2004 |
| EU498700.1 | Italy | Cat | 2006 |
| KU248464.1 | Portugal | Cat | 2014 |
| EU221279.1 | Portugal | Cat | 2005 |
| EF418569.1 | Portugal | Lion | 2006 |
| EF418568.1 | Portugal | Tiger | 2006 |
| EU221278.1 | Portugal | Cat | 2005 |
| EU221280.1 | Portugal | Cat | 2006 |
| KT240131.1 | Portugal | Cat | 2008 |
| KT240135.1 | Portugal | Cat | 2014 |
| KT240133.1 | Portugal | Cat | 2013 |
| KU248462.1 | Portugal | Cat | 2007 |
| KT240129.1 | Portugal | Cat | 2007 |
| KU248463.1 | Portugal | Cat | 2008 |
| EU498710.1 | Italy | Cat | 2006 |
| EU498689.1 | Italy | Cat | 2004 |
| EU498703.1 | Italy | Cat | 2006 |
| EU498709.1 | Italy | Cat | 2006 |
| EU498697.1 | Italy | Cat | 2006 |
| MZ357121.1 | China | Cat | 2020 |
| MZ357121.1 | China | Giant Panda | 2020 |
| OK384309.1 | China | Cat | 2019 |
| MW847200.1 | Italy | Cat | 2018 |
| MW847165.1 | Italy | Cat | 2016 |
| MN451692.1 | USA | Racoon | 2011 |
| FJ231389.1 | China | Monkey | 2008 |
| MK266799.1 | China | Cat | 2018 |
| EU498687.1 | Italy | Cat | 2003 |
| MW847179.1 | Italy | Cat | 2017 |
| MW847173.1 | Italy | Cat | 2016 |
| MW847175.1 | Italy | Cat | 2016 |
| MW847176.1 | Italy | Cat | 2016 |
| MW847177.1 | Italy | Cat | 2016 |
| MW847178.1 | Italy | Cat | 2017 |
| MW847189.1 | Italy | Cat | 2017 |
| MW847188.1 | Italy | Cat | 2017 |
| MW847183.1 | Italy | Cat | 2017 |
| EU498705.1 | Italy | Cat | 2006 |
| MW847169.1 | Italy | Cat | 2016 |
| MW847190.1 | Italy | Cat | 2017 |
| MW847191.1 | Italy | Cat | 2017 |
| MW847192.1 | Italy | Cat | 2017 |
| MW847194.1 | Italy | Cat | 2017 |
| MW847199.1 | Italy | Cat | 2018 |
| MW847155.1 | Italy | Cat | 2011 |
| MW847193.1 | Italy | Cat | 2017 |
| MW847187.1 | Italy | Cat | 2017 |
| KX434461.1 | Italy | Cat | 2015 |
| MW847174.1 | Italy | Cat | 2016 |
| MW847158.1 | Italy | Cat | 2011 |
| MW847181.1 | Italy | Cat | 2017 |
| MW847180.1 | Italy | Cat | 2017 |
| MK671167.1 | China | Cat | 2017 |
| MN419000.1 | China | Cat | 2019 |
| MW926316.1 | UK | Cat | 2019 |
| MZ836357.1 | China | Cat | 2020 |
| MN419005.1 | China | Cat | 2019 |
| MH165481.1 | China | Cat | 2015 |
| MN127781.1 | Thailand | Cat | 2019 |
| JX475253.1 | USA | Cougar | 2010 |
| MH165482.1 | China | Cat | 2014 |
| OQ615264.1 | v | v | 2023 |
| EU498717.1 | UK | Cat | 2007 |
| EU498719.1 | UK | Cat | 2007 |
| EU498681.1 | v | v | 2008 |
| JX475270.1 | USA | Racoon | 2012 |
| EU498680.1 | v | v | 2008 |
| OM640096.1 | Canada | Cat | 2018 |
| MN862745.1 | Canada | American Marten | 2017 |
| MW926314.1 | UK | Cat | 2019 |
| MW847201.1 | Italy | Cat | 2018 |
| MZ508522.1 | Italy | Cat | 2018 |
| MW847159.1 | Italy | Cat | 2012 |
| EU498714.1 | UK | Cat | 2006 |
| HQ184197.1 | South Korea | Cat | 2008 |
| HQ184193.1 | South Korea | Cat | 2008 |
| HQ184192.1 | South Korea | Cat | 2008 |
| EU498713.1 | UK | Cat | 2006 |
| MF069446.1 | Canada | Racoon | 2010 |
| EU659112.1 | USA | Cat | 1964 |
| MT270578.1 | China | Cat | 2019 |
| MT270570.1 | China | Cat | 2019 |
| MT270567.1 | China | Cat | 2019 |
| MT270545.1 | China | Cat | 2019 |
| MT857268.1 | Viet Nam | Cat | 2018 |
| MK357742.1 | Vietnam | Dog | 2018 |
| MT857270.1 | Viet Nam | Cat | 2018 |
| MT857281.1 | Viet Nam | Cat | 2018 |
| MT857278.1 | Viet Nam | Cat | 2018 |
| MT857272.1 | Viet Nam | Cat | 2018 |
| MT857280.1 | Viet Nam | Cat | 2018 |
| MT857279.1 | Viet Nam | Cat | 2018 |
| MT857277.1 | Viet Nam | Cat | 2018 |
| MT857276.1 | Viet Nam | Cat | 2018 |
| MK357739.1 | Viet Nam | Dog | 2017 |
| MK357738.1 | Viet Nam | Dog | 2017 |
| MT857286.1 | Viet Nam | Cat | 2018 |
| MK357740.1 | Viet Nam | Dog | 2017 |
| MK357743.1 | Viet Nam | Dog | 2018 |
| MK357741.1 | Viet Nam | Dog | 2018 |
| MT857269.1 | Viet Nam | Cat | 2018 |
| MT857275.1 | Viet Nam | Cat | 2018 |
| MT857271.1 | Viet Nam | Cat | 2018 |
| MT857282.1 | Viet Nam | Cat | 2018 |
| MT857284.1 | Viet Nam | Cat | 2018 |
| MT857283.1 | Viet Nam | Cat | 2018 |
| MT857285.1 | Viet Nam | Cat | 2018 |
| MT857273.1 | Viet Nam | Cat | 2018 |
| MT857274.1 | Viet Nam | Cat | 2018 |
| MK266789.1 | China | Cat | 2018 |
| MK266788.1 | China | Cat | 2017 |
| MK266790.1 | China | Cat | 2016 |
| MW847202.1 | Italy | Cat | 2018 |
| MN419004.1 | China | Cat | 2019 |
| MZ357122.1 | China | Giant Panda | 2018 |
| MK266791.1 | China | Cat | 2017 |
| FJ936171.1 | China | Cat | 2008 |
| MG764510.1 | China | Tiger | 1999 |
| MK671156.1 | China | Cat | 2016 |
| MN419003.1 | China | Cat | 2019 |
| MK671183.1 | China | Cat | 2018 |
| MK266792.1 | China | Cat | 2017 |
| MK671155.1 | China | Cat | 2016 |
| MK671171.1 | China | Cat | 2017 |
| MK671170.1 | China | Cat | 2017 |
| MK671173.1 | China | Cat | 2018 |
| MH329286.1 | China | Cat | 2016 |
| MT270582.1 | China | Cat | 2019 |
| MN418997.1 | China | Cat | 2019 |
| MN418998.1 | China | Cat | 2019 |
| MK671187.1 | China | Cat | 2018 |
| MK671172.1 | China | Cat | 2018 |
| MK671180.1 | China | Cat | 2018 |
| MK671181.1 | China | Cat | 2018 |
| MN419007.1 | China | Cat | 2019 |
| MN419010.1 | China | Cat | 2019 |
| MN419006.1 | China | Cat | 2019 |
| MN419011.1 | China | Cat | 2019 |
| MT270577.1 | China | Cat | 2019 |
| MT270549.1 | China | Cat | 2019 |
| MT270546.1 | China | Cat | 2019 |
| MN419013.1 | China | Cat | 2019 |
| MK671150.1 | China | Cat | 2016 |
| MK266784.1 | China | Cat | 2017 |
| MK671165.1 | China | Cat | 2017 |
| MK266785.1 | China | Cat | 2017 |
| MK671168.1 | China | Cat | 2017 |
| EU697383.1 | China | Tiger | 2007 |
| OP471919.1 | China | Cat | 2019 |
| KP280068.1 | China | Cat | 2014 |
| EU697384.1 | China | Tiger | 2007 |
| EU697386.1 | China | Tiger | 2007 |
| FJ405225.1 | China | Tiger | 2008 |
| EU697387.1 | China | Tiger | 2007 |
| MK671164.1 | China | Cat | 2017 |
| MK671151.1 | China | Cat | 2016 |
| MK671162.1 | China | Cat | 2017 |
| MK266786.1 | China | Cat | 2017 |
| MK266787.1 | China | Cat | 2018 |
| MK671157.1 | China | Cat | 2017 |
| MK671153.1 | China | Cat | 2016 |
| MK671163.1 | China | Cat | 2017 |
| MK671158.1 | China | Cat | 2017 |
| MK671182.1 | China | Cat | 2018 |
| MK671188.1 | China | Cat | 2018 |
| MZ836351.1 | China | Cat | 2020 |
| MN419009.1 | China | Cat | 2019 |
| MN419008.1 | China | Cat | 2019 |
| MT270584.1 | China | Cat | 2019 |
| MT270583.1 | China | Cat | 2019 |
| MW091487.1 | China | Giant Panda | 2018 |
| MW331496.1 | China | Giant Panda | 2020 |
| MZ357119.1 | China | Giant Panda | 2020 |
| MZ712026.1 | China | Giant Panda | 2020 |
| KX685354.1 | China | Tiger | 2016 |
| MG764511.1 | China | Lion | 2015 |
| KX900570.1 | China | Jaguar | 1986 |
| KT240130.1 | Portugal | Cat | 2008 |
| MW847197.1 | Italy | Cat | 2018 |
| MW847196.1 | Italy | Cat | 2018 |
| EU221281.1 | Portugal | Cat | 2006 |
| MW847185.1 | Italy | Cat | 2017 |
| OM638042.1 | Italy | Dog | 2021 |
| MT274378.1 | Italy | Badger | 2019 |
| MW847209.1 | Italy | Cat | 2019 |
| MW847206.1 | Italy | Cat | 2019 |
| MW847207.1 | Italy | Cat | 2019 |
| OP796713.1 | China | Cat | 2021 |
| OP796714.1 | China | Cat | 2021 |
| OP796716.1 | China | Cat | 2021 |
| MW017627.1 | China | Cat | 2020 |
| HQ184201.1 | South Korea | Cat | 2008 |
| HQ184198.1 | South Korea | Cat | 2008 |
| KU248460.1 | Portugal | Cat | 2006 |
| KU248459.1 | Portugal | Cat | 2006 |
| KU248457.1 | Portugal | Cat | 2006 |
| KT240132.1 | Portugal | Cat | 2012 |
| KU248461.1 | Portugal | Cat | 2006 |
| KT240128.1 | Portugal | Cat | 2006 |
| KU248456.1 | Portugal | Cat | 2006 |
| KU248458.1 | Portugal | Cat | 2006 |
| EU498692.1 | Italy | Cat | 2004 |
| MT274377.1 | Italy | Red Fox | 2017 |
| EU498690.1 | Italy | Cat | 2004 |
| EU498693.1 | Italy | Cat | 2004 |
| EU498698.1 | Italy | Cat | 2006 |
| EU498704.1 | Italy | Cat | 2006 |
| KJ813894.1 | USA | Racoon | 2012 |
| KJ813895.1 | USA | Racoon | 2012 |
| EU498686.1 | Italy | Cat | 2003 |
| EU498682.1 | Italy | Cat | 2001 |
| MZ836367.1 | China | Cat | 2020 |
| MZ836369.1 | China | Cat | 2020 |
| OM937916.1 | Egypt | Cat | 2019 |
| OM638043.1 | Egypt | Dog | 2021 |
| MN127779.1 | Thailand | Cat | 2018 |
| MN127780.1 | Thailand | Cat | 2019 |
| OQ266795.1 | India | Cat | 2022 |
| MH559110.1 | India | Cat | 2018 |
| MW017625.1 | China | Cat | 2020 |
| MG924893.1 | China | Cat | 2016 |
| MK671177.1 | China | Cat | 2018 |
| MK266795.1 | China | Cat | 2017 |
| MK671175.1 | China | Cat | 2018 |
| MK671174.1 | China | Cat | 2018 |
| MK671176.1 | China | Cat | 2018 |
| MK671152.1 | China | Cat | 2016 |
| MK671161.1 | China | Cat | 2017 |
| MH669800.1 | Thailand | Prionodon Linsang | 2015 |
| MZ508524.1 | Italy | Cat | 2018 |
| HQ184199.1 | South Korea | Cat | 2008 |
| HQ184203.1 | South Korea | Cat | 2008 |
| HQ184194.1 | South Korea | Cat | 2008 |
| HQ184202.1 | South Korea | Cat | 2008 |
| HQ184204.1 | South Korea | Cat | 2008 |
| MK671160.1 | China | Cat | 2017 |
| MK671186.1 | China | Cat | 2018 |
| HQ184191.1 | South Korea | Cat | 2008 |
| HQ184196.1 | South Korea | Cat | 2008 |
| HQ184189.1 | South Korea | Cat | 2008 |
| HQ184190.1 | South Korea | Cat | 2008 |
| MT270564.1 | China | Cat | 2019 |
| MT270563.1 | China | Cat | 2019 |
| MT270566.1 | China | Cat | 2019 |
| MN419001.1 | China | Cat | 2019 |
| MN419002.1 | China | Cat | 2019 |
| HQ184200.1 | South Korea | Cat | 2008 |
| MZ836374.1 | China | Cat | 2020 |
| MZ836370.1 | China | Cat | 2020 |
| MZ836371.1 | China | Cat | 2020 |
| MZ836375.1 | China | Cat | 2020 |
| MZ836359.1 | China | Cat | 2020 |
| MZ836360.1 | China | Cat | 2020 |
| MT178243.1 | China | Cheetah | 2019 |
| MT270585.1 | China | Cat | 2019 |
| MK266783.1 | China | Cat | 2018 |
| MK266782.1 | China | Cat | 2017 |
| MK671166.1 | China | Cat | 2017 |
| MZ005633.1 | China | Lion | 2020 |
| OQ863619.1 | China | Cat | 2019 |
| MW017628.1 | China | Cat | 2020 |
| JX048608.1 | Taiwan | Cat | 2011 |
| MZ836366.1 | China | Cat | 2020 |
| MZ836377.1 | China | Cat | 2020 |
| MZ836365.1 | China | Cat | 2020 |
| MZ836376.1 | China | Cat | 2020 |
| MZ836378.1 | China | Cat | 2019 |
| MZ836362.1 | China | Cat | 2020 |
| MT270543.1 | China | Cat | 2019 |
| OQ863616.1 | China | Cat | 2019 |
| KC473946.1 | China | Cat | 2012 |
| MK266793.1 | China | Cat | 2018 |
| MK266794.1 | China | Cat | 2017 |

**APPENDIX B – VIRAL SEQUENCES CORRECTED BY TEMPEST SOFTWARE (n = 268)**

| **GenBank Access** | **Country** | **Animal** | **Year** |
| --- | --- | --- | --- |
| MT270576.1 | China | Cat | 2019 |
| MT270575.1 | China | Cat | 2019 |
| MT270574.1 | China | Cat | 2019 |
| MT270569.1 | China | Cat | 2019 |
| OK384312.1 | China | Cat | 2019 |
| OK384314.1 | China | Cat | 2019 |
| MT270571.1 | China | Cat | 2019 |
| MT270540.1 | China | Cat | 2019 |
| MT270544.1 | China | Cat | 2019 |
| EU145593.1 | Hungary | Asian Palm Civet | 2008 |
| MT270534.1 | China | Cat | 2019 |
| MN418999.1 | China | Cat | 2019 |
| MN419012.1 | China | Cat | 2019 |
| MT892650.1 | China | Cat | 2019 |
| MT614366.1 | China | Cat | 2019 |
| MK266797.1 | China | Cat | 2017 |
| MW017616.1 | China | Dog | 2020 |
| MN908257.1 | China | South China Tiger | 2019 |
| MT270581.1 | China | Cat | 2019 |
| OP796707.1 | China | Cat | 2021 |
| OP796708.1 | China | Cat | 2021 |
| OP796709.1 | China | Cat | 2021 |
| OP796712.1 | China | Cat | 2021 |
| OP796710.1 | China | Cat | 2021 |
| OP796711.1 | China | Cat | 2021 |
| OP796715.1 | China | Cat | 2021 |
| OP796706.1 | China | Cat | 2021 |
| MN451652.1 | Finland | Arctic Fox | 1983 |
| MW847167.1 | Italy | Cat | 2016 |
| KX434462.1 | Italy | Cat | 2015 |
| EU498716.1 | UK | Cat | 2007 |
| MK671154.1 | China | Cat | 2016 |
| MK671159.1 | China | Cat | 2017 |
| MK671178.1 | China | Cat | 2018 |
| EU498701.1 | Italy | Cat | 2006 |
| EU498707.1 | Italy | Cat | 2006 |
| EU498720.1 | Italy | Cat | 2007 |
| JX475256.1 | USA | Cougar | 2011 |
| MZ508526.1 | Italy | Cat | 2019 |
| KT240134.1 | Portugal | Cat | 2013 |
| KT240136.1 | Portugal | Cat | 2014 |
| JN867596.1 | USA | Racoon | 1978 |
| KM624023.1 | USA | Racoon | 1978 |
| EU659111.1 | USA | Cat | 1967 |
| MF069447.1 | Canada | Racoon | 2016 |
| JN867594.1 | USA | Racoon | 1990 |
| KJ813893.1: | USA | Bobcat | 2013 |
| EU659113.1 | USA | Mountain Lion | 1989 |
| EU659114.1 | USA | Mountain Lion | 1989 |
| MN862743.1 | Canada | Vison | 2018 |
| JX475259.1 | USA | Cougar | 2010 |
| MN862747.1 | Canada | Vison | 2019 |
| MN862744.1 | Canada | American Marten | 2016 |
| MN862749.1 | Canada | North American River Otter | 2019 |
| EU498706.1 | Italy | Cat | 2006 |
| MT270538.1 | China | Cat | 2019 |
| MK671184.1 | China | Cat | 2018 |
| MK671179.1 | China | Cat | 2018 |
| MK671169.1 | China | Cat | 2017 |
| MK671185.1 | China | Cat | 2018 |
| HQ184195.1 | South Korea | Cat | 2008 |
| MW847205.1 | Italy | Cat | 2019 |
| EU498699.1 | Italy | Cat | 2006 |
| MZ357120.1 | China | Giant Panda | 2020 |
| MZ836350.1 | China | Cat | 2020 |
| MT270559.1 | China | Cat | 2019 |
| FJ440714.1 | Argentina | Cat | 2007 |
| FJ440712.1 | Argentina | Cat | 2007 |
| FJ440711.1 | Argentina | Cat | 2007 |
| FJ440713.1 | Argentina | Cat | 2007 |
| MW847208.1 | Italy | Cat | 2018 |
| MW847162.1 | Italy | Cat | 2013 |
| MW847171.1 | Italy | Cat | 2016 |
| MW847203.1 | Italy | Cat | 2019 |
| MW847160.1 | Italy | Cat | 2012 |
| MW847156.1 | Italy | Cat | 2011 |
| EU498708.1 | Italy | Cat | 2006 |
| MZ508523.1 | Italy | Cat | 2018 |
| EU498694.1 | Italy | Cat | 2005 |
| EU498684.1 | Italy | Cat | 2002 |
| EU498712.1 | Italy | Cat | 2006 |
| EU498711.1 | Italy | Cat | 2006 |
| EU498695.1 | Italy | Cat | 2005 |
| EU498685.1 | Italy | Cat | 2003 |
| KP769859.1 | Belgium | Cat | 2013 |
| MW847182.1 | Italy | Cat | 2017 |
| MW847186.1 | Italy | Cat | 2017 |
| MW847157.1 | Italy | Cat | 2011 |
| EU498688.1 | Italy | Cat | 2004 |
| MW847164.1 | Italy | Cat | 2016 |
| EU498715.1 | Italy | Cat | 2006 |
| EU498700.1 | Italy | Cat | 2006 |
| KU248464.1 | Portugal | Cat | 2014 |
| EF418569.1 | Portugal | Lion | 2006 |
| EU221280.1 | Portugal | Cat | 2006 |
| KT240131.1 | Portugal | Cat | 2008 |
| KT240133.1 | Portugal | Cat | 2013 |
| KU248462.1 | Portugal | Cat | 2007 |
| EU498710.1 | Italy | Cat | 2006 |
| EU498709.1 | Italy | Cat | 2006 |
| EU498697.1 | Italy | Cat | 2006 |
| MZ357121.1 | China | Cat | 2020 |
| OK384309.1 | China | Cat | 2019 |
| MW847200.1 | Italy | Cat | 2018 |
| MW847165.1 | Italy | Cat | 2016 |
| MN451692.1 | USA | Racoon | 2011 |
| FJ231389.1 | China | Monkey | 2008 |
| EU498687.1 | Italy | Cat | 2003 |
| MW847179.1 | Italy | Cat | 2017 |
| EU498705.1 | Italy | Cat | 2006 |
| MW847169.1 | Italy | Cat | 2016 |
| MW847199.1 | Italy | Cat | 2018 |
| MW847155.1 | Italy | Cat | 2011 |
| MW847193.1 | Italy | Cat | 2017 |
| KX434461.1 | Italy | Cat | 2015 |
| MW847174.1 | Italy | Cat | 2016 |
| MW847181.1 | Italy | Cat | 2017 |
| MW847180.1 | Italy | Cat | 2017 |
| MK671167.1 | China | Cat | 2017 |
| MN419000.1 | China | Cat | 2019 |
| MW926316.1 | UK | Cat | 2019 |
| MZ836357.1 | China | Cat | 2020 |
| MN419005.1 | China | Cat | 2019 |
| MH165481.1 | China | Cat | 2015 |
| JX475253.1 | USA | Cougar | 2010 |
| OQ615264.1 | v | v | 2023 |
| EU498717.1 | UK | Cat | 2007 |
| EU498681.1 | v | v | 2008 |
| EU498680.1 | v | v | 2008 |
| MN862745.1 | Canada | American Marten | 2017 |
| MW847201.1 | Italy | Cat | 2018 |
| MW847159.1 | Italy | Cat | 2012 |
| EU498714.1 | UK | Cat | 2006 |
| HQ184197.1 | South Korea | Cat | 2008 |
| HQ184193.1 | South Korea | Cat | 2008 |
| HQ184192.1 | South Korea | Cat | 2008 |
| EU498713.1 | UK | Cat | 2006 |
| MF069446.1 | Canada | Racoon | 2010 |
| EU659112.1 | USA | Cat | 1964 |
| MT270578.1 | China | Cat | 2019 |
| MT270570.1 | China | Cat | 2019 |
| MK357742.1 | Vietnam | Dog | 2018 |
| MT857281.1 | Viet Nam | Cat | 2018 |
| MT857278.1 | Viet Nam | Cat | 2018 |
| MT857280.1 | Viet Nam | Cat | 2018 |
| MT857279.1 | Viet Nam | Cat | 2018 |
| MT857277.1 | Viet Nam | Cat | 2018 |
| MT857286.1 | Viet Nam | Cat | 2018 |
| MK357741.1 | Viet Nam | Dog | 2018 |
| MT857269.1 | Viet Nam | Cat | 2018 |
| MT857275.1 | Viet Nam | Cat | 2018 |
| MT857271.1 | Viet Nam | Cat | 2018 |
| MT857282.1 | Viet Nam | Cat | 2018 |
| MT857284.1 | Viet Nam | Cat | 2018 |
| MT857283.1 | Viet Nam | Cat | 2018 |
| MT857285.1 | Viet Nam | Cat | 2018 |
| MK266789.1 | China | Cat | 2018 |
| MK266788.1 | China | Cat | 2017 |
| MK266790.1 | China | Cat | 2016 |
| MW847202.1 | Italy | Cat | 2018 |
| MN419004.1 | China | Cat | 2019 |
| MK266791.1 | China | Cat | 2017 |
| FJ936171.1 | China | Cat | 2008 |
| MK671156.1 | China | Cat | 2016 |
| MK671183.1 | China | Cat | 2018 |
| MK671155.1 | China | Cat | 2016 |
| MK671171.1 | China | Cat | 2017 |
| MK671170.1 | China | Cat | 2017 |
| MT270582.1 | China | Cat | 2019 |
| MK671187.1 | China | Cat | 2018 |
| MK671172.1 | China | Cat | 2018 |
| MK671181.1 | China | Cat | 2018 |
| MN419010.1 | China | Cat | 2019 |
| MN419011.1 | China | Cat | 2019 |
| MT270577.1 | China | Cat | 2019 |
| MK671150.1 | China | Cat | 2016 |
| MK671165.1 | China | Cat | 2017 |
| MK671168.1 | China | Cat | 2017 |
| EU697383.1 | China | Tiger | 2007 |
| OP471919.1 | China | Cat | 2019 |
| KP280068.1 | China | Cat | 2014 |
| EU697384.1 | China | Tiger | 2007 |
| EU697386.1 | China | Tiger | 2007 |
| FJ405225.1 | China | Tiger | 2008 |
| EU697387.1 | China | Tiger | 2007 |
| MK671164.1 | China | Cat | 2017 |
| MK671151.1 | China | Cat | 2016 |
| MK671162.1 | China | Cat | 2017 |
| MK671163.1 | China | Cat | 2017 |
| MK671182.1 | China | Cat | 2018 |
| MK671188.1 | China | Cat | 2018 |
| MN419009.1 | China | Cat | 2019 |
| MN419008.1 | China | Cat | 2019 |
| MT270584.1 | China | Cat | 2019 |
| MW091487.1 | China | Giant Panda | 2018 |
| KX685354.1 | China | Tiger | 2016 |
| MG764511.1 | China | Lion | 2015 |
| KX900570.1 | China | Jaguar | 1986 |
| KT240130.1 | Portugal | Cat | 2008 |
| MW847197.1 | Italy | Cat | 2018 |
| MW847185.1 | Italy | Cat | 2017 |
| MW847209.1 | Italy | Cat | 2019 |
| MW847206.1 | Italy | Cat | 2019 |
| MW847207.1 | Italy | Cat | 2019 |
| OP796713.1 | China | Cat | 2021 |
| OP796714.1 | China | Cat | 2021 |
| OP796716.1 | China | Cat | 2021 |
| MW017627.1 | China | Cat | 2020 |
| HQ184201.1 | South Korea | Cat | 2008 |
| HQ184198.1 | South Korea | Cat | 2008 |
| KU248461.1 | Portugal | Cat | 2006 |
| KT240128.1 | Portugal | Cat | 2006 |
| EU498692.1 | Italy | Cat | 2004 |
| MT274377.1 | Italy | Red Fox | 2017 |
| EU498690.1 | Italy | Cat | 2004 |
| EU498693.1 | Italy | Cat | 2004 |
| EU498698.1 | Italy | Cat | 2006 |
| EU498704.1 | Italy | Cat | 2006 |
| KJ813894.1 | USA | Racoon | 2012 |
| KJ813895.1 | USA | Racoon | 2012 |
| EU498682.1 | Italy | Cat | 2001 |
| MZ836367.1 | China | Cat | 2020 |
| MZ836369.1 | China | Cat | 2020 |
| OM937916.1 | Egypt | Cat | 2019 |
| OM638043.1 | Egypt | Dog | 2021 |
| MN127779.1 | Thailand | Cat | 2018 |
| MN127780.1 | Thailand | Cat | 2019 |
| MW017625.1 | China | Cat | 2020 |
| MG924893.1 | China | Cat | 2016 |
| MK671177.1 | China | Cat | 2018 |
| MK671175.1 | China | Cat | 2018 |
| MK671174.1 | China | Cat | 2018 |
| MK671176.1 | China | Cat | 2018 |
| MK671152.1 | China | Cat | 2016 |
| MK671161.1 | China | Cat | 2017 |
| MH669800.1 | Thailand | Prionodon Linsang | 2015 |
| MZ508524.1 | Italy | Cat | 2018 |
| HQ184199.1 | South Korea | Cat | 2008 |
| HQ184203.1 | South Korea | Cat | 2008 |
| HQ184194.1 | South Korea | Cat | 2008 |
| HQ184202.1 | South Korea | Cat | 2008 |
| HQ184204.1 | South Korea | Cat | 2008 |
| MK671160.1 | China | Cat | 2017 |
| MK671186.1 | China | Cat | 2018 |
| HQ184191.1 | South Korea | Cat | 2008 |
| HQ184196.1 | South Korea | Cat | 2008 |
| HQ184189.1 | South Korea | Cat | 2008 |
| HQ184190.1 | South Korea | Cat | 2008 |
| MT270566.1 | China | Cat | 2019 |
| MN419002.1 | China | Cat | 2019 |
| HQ184200.1 | South Korea | Cat | 2008 |
| MZ836375.1 | China | Cat | 2020 |
| MT270585.1 | China | Cat | 2019 |
| MK266783.1 | China | Cat | 2018 |
| MK266782.1 | China | Cat | 2017 |
| MK671166.1 | China | Cat | 2017 |
| MZ005633.1 | China | Lion | 2020 |
| OQ863619.1 | China | Cat | 2019 |
| MW017628.1 | China | Cat | 2020 |
| JX048608.1 | Taiwan | Cat | 2011 |
| MZ836366.1 | China | Cat | 2020 |
| MZ836378.1 | China | Cat | 2019 |
| MT270543.1 | China | Cat | 2019 |
| OQ863616.1 | China | Cat | 2019 |
| KC473946.1 | China | Cat | 2012 |
| MK266793.1 | China | Cat | 2018 |
| MK266794.1 | China | Cat | 2017 |
| MW847163.1 | Italy | Cat | 2013 |
